# Supplementary material
Source: HighWire-hosted journal article supplement (https://gut.bmj.com/content/68/10/1846)

# Supplemental Figure 1

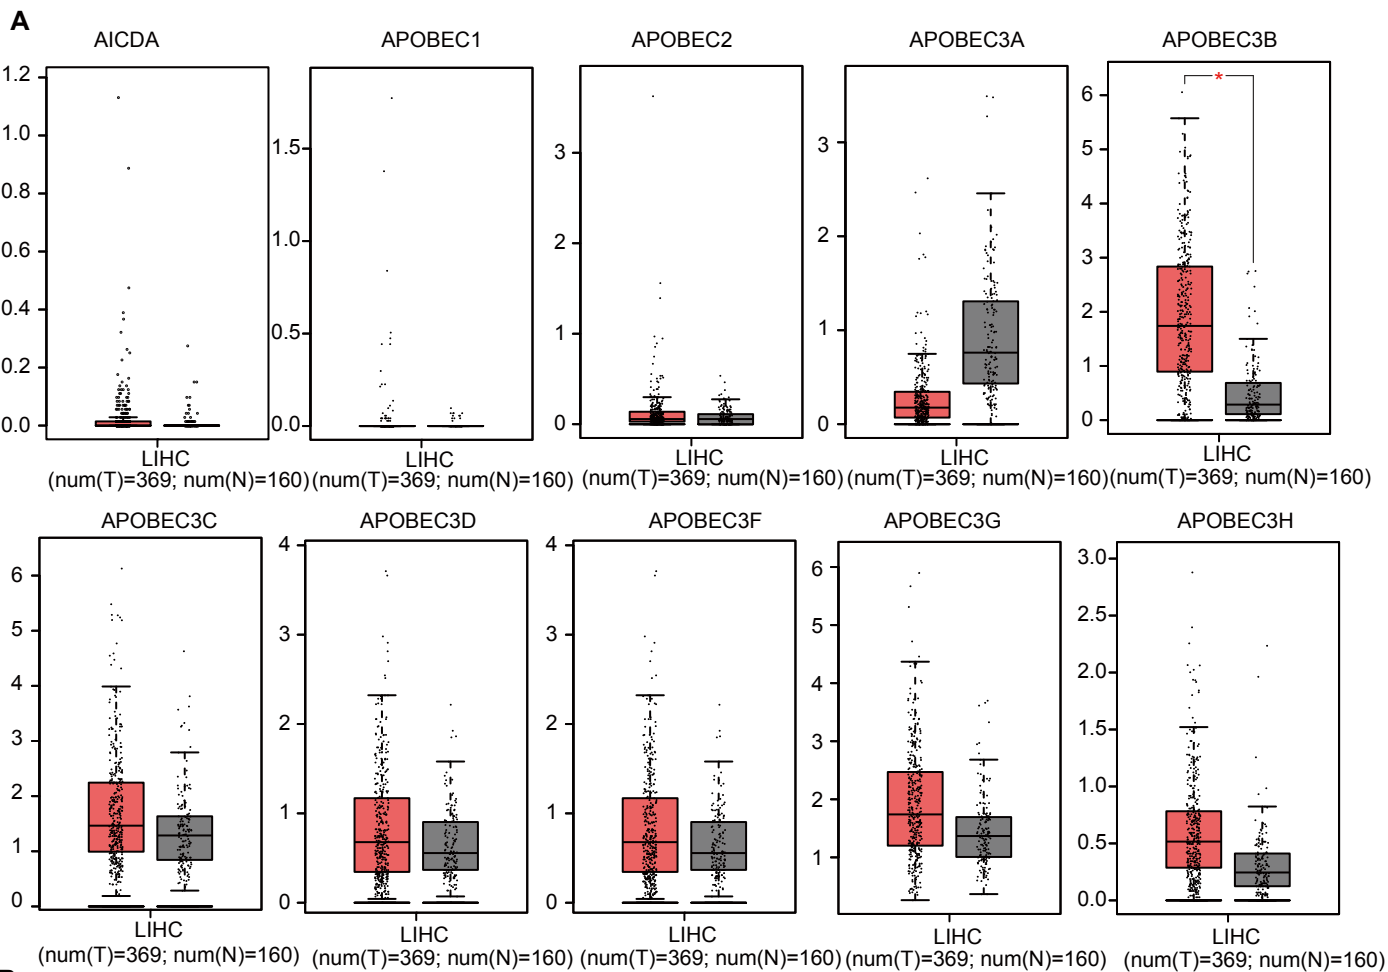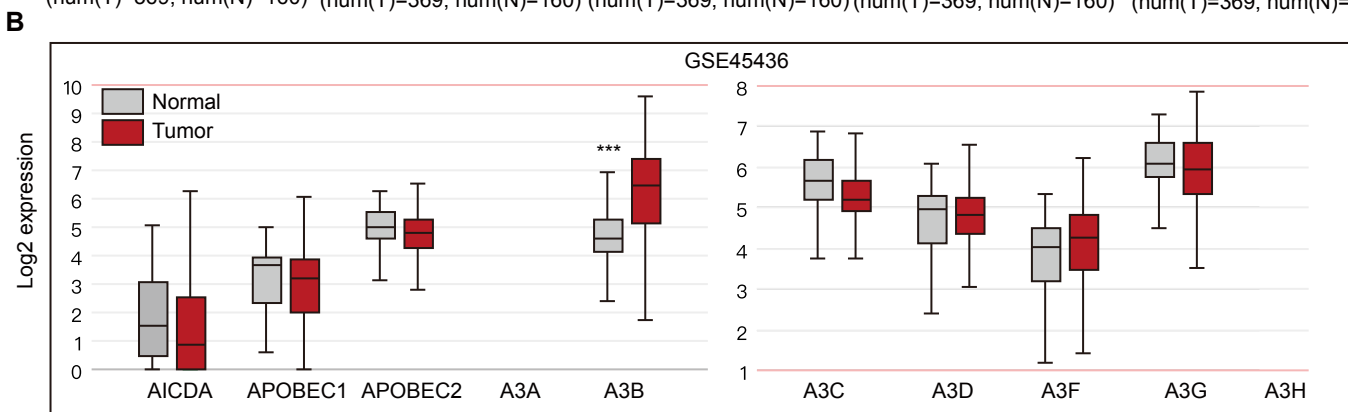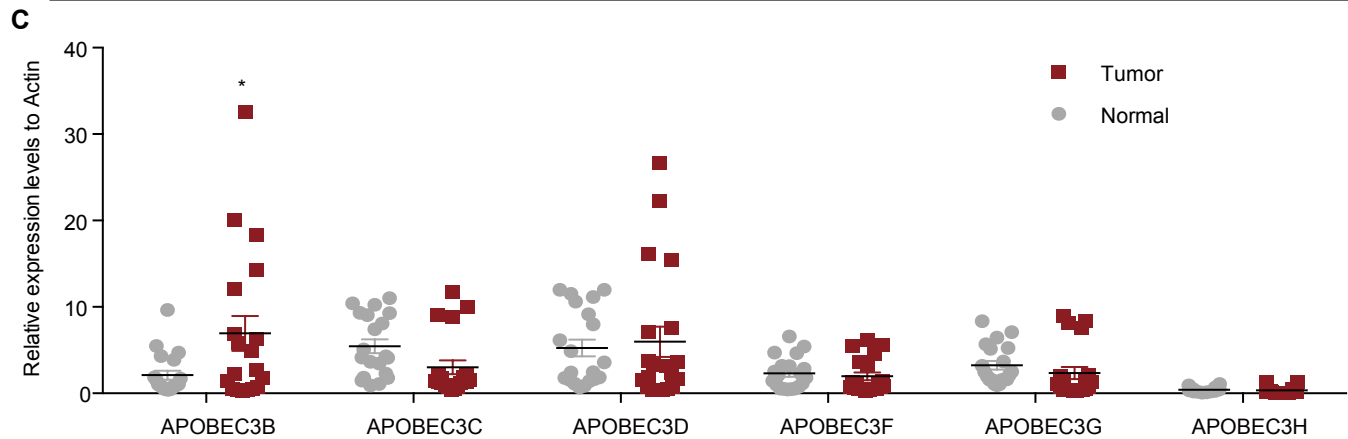

Supplement: inline-supplementary-material-1 [file inline-supplementary-material-1.pdf]

## Supplemental Figure 2

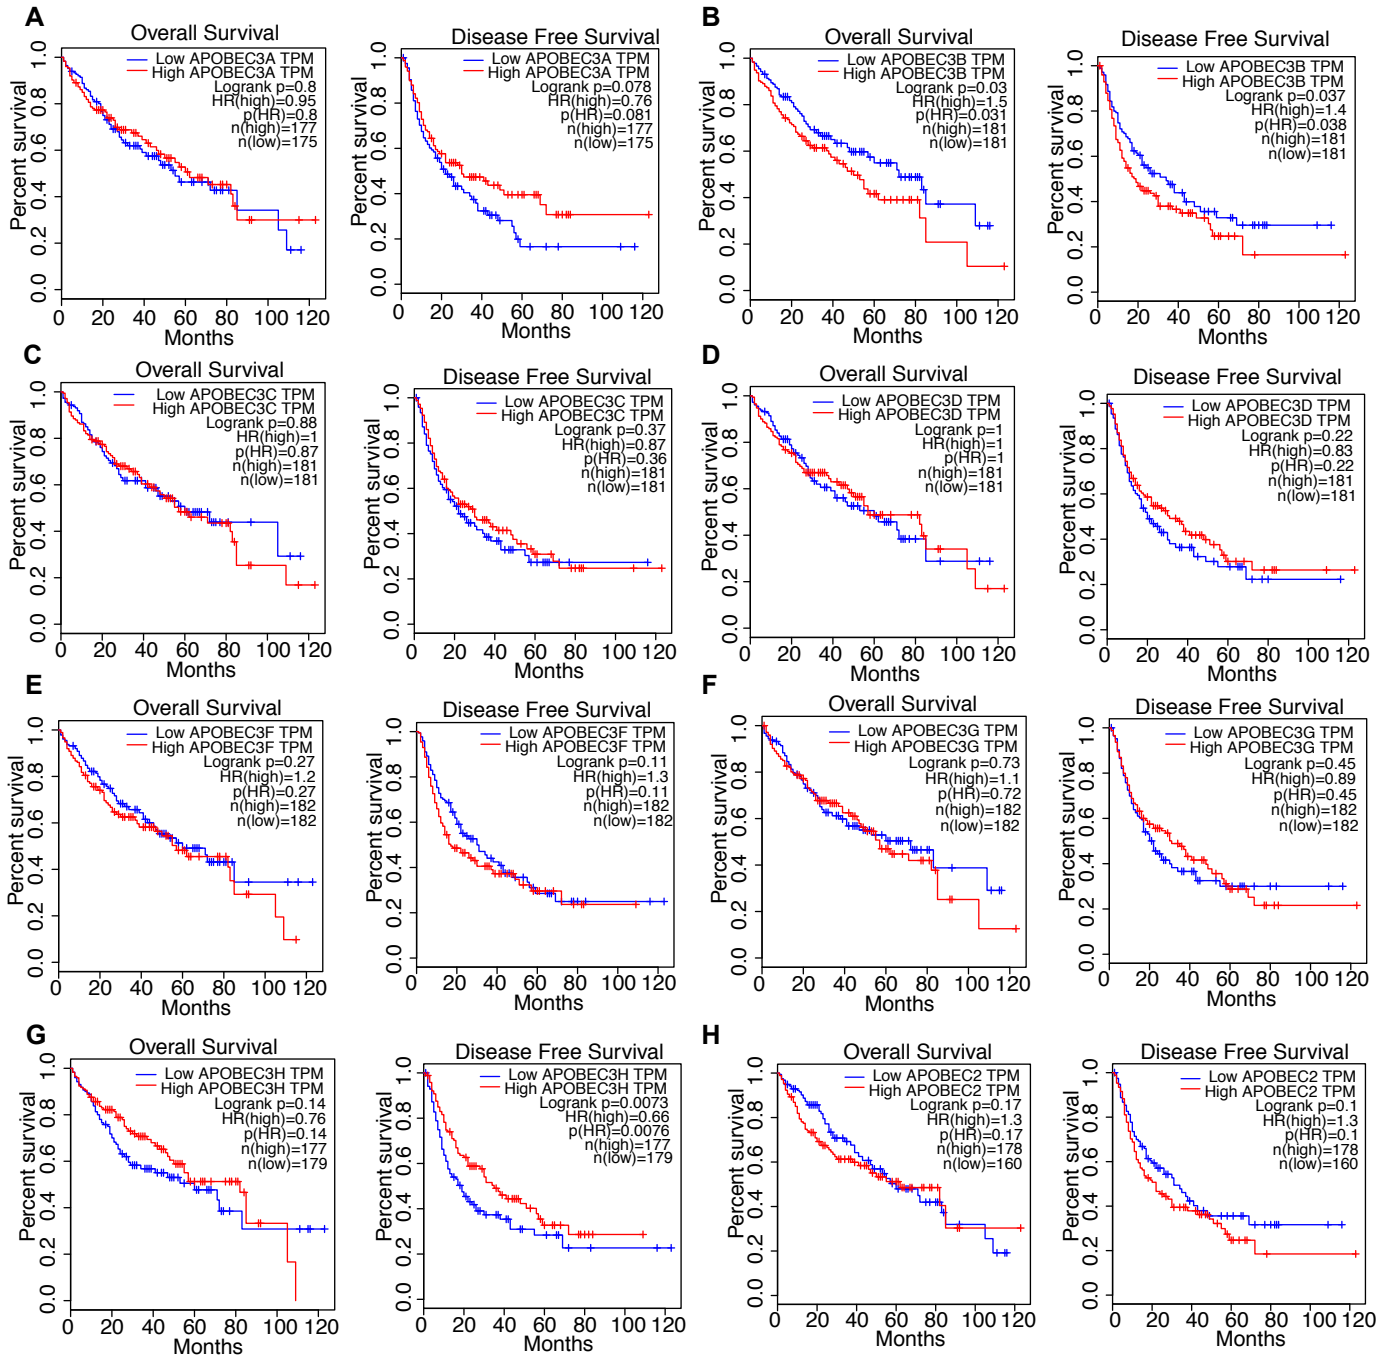

Supplement: inline-supplementary-material-2 [file inline-supplementary-material-2.pdf]

## Supplemental Figure 3

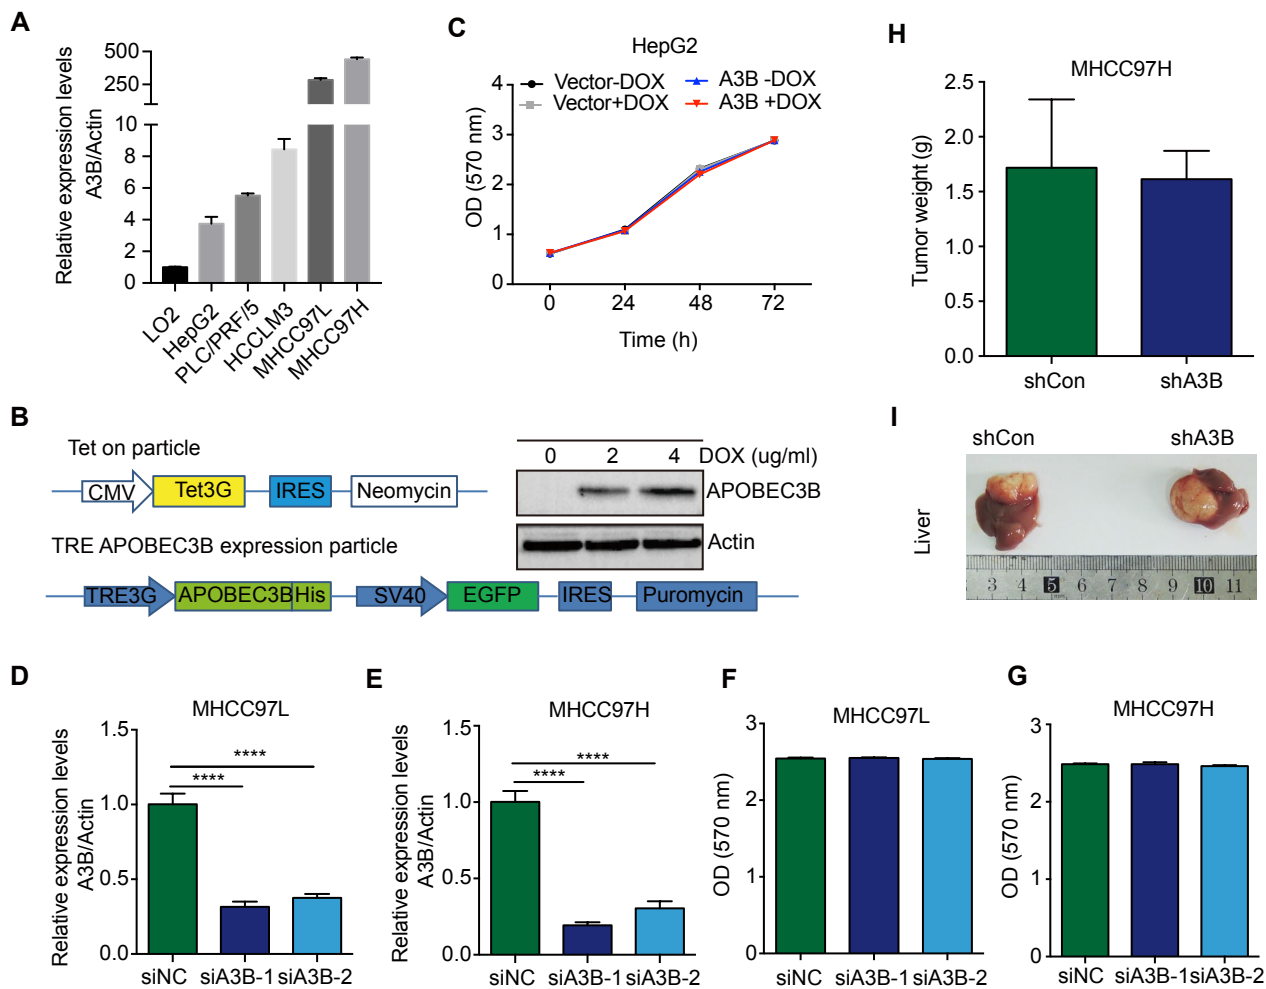

Supplement: inline-supplementary-material-3 [file inline-supplementary-material-3.pdf]

## Supplemental Figure 4

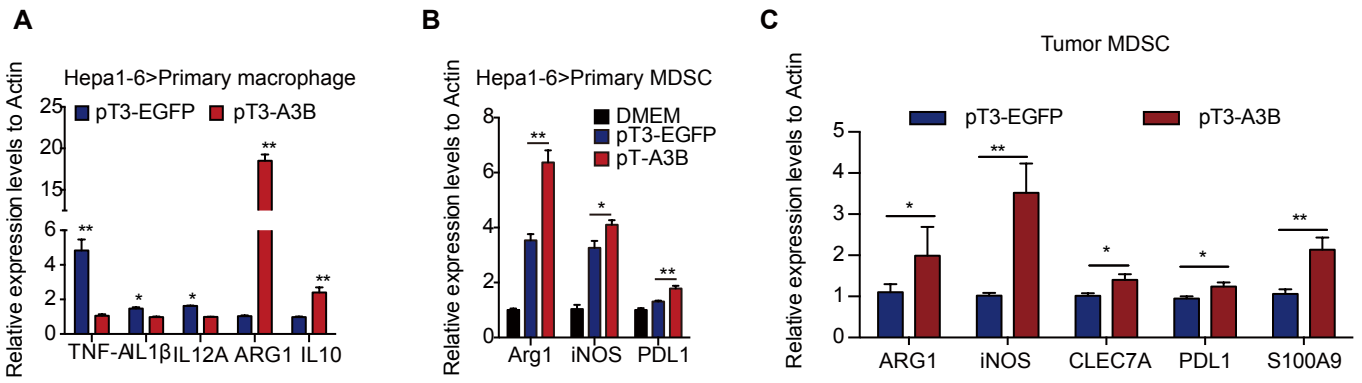

Supplement: inline-supplementary-material-4 [file inline-supplementary-material-4.pdf]

## Supplemental Figure 5

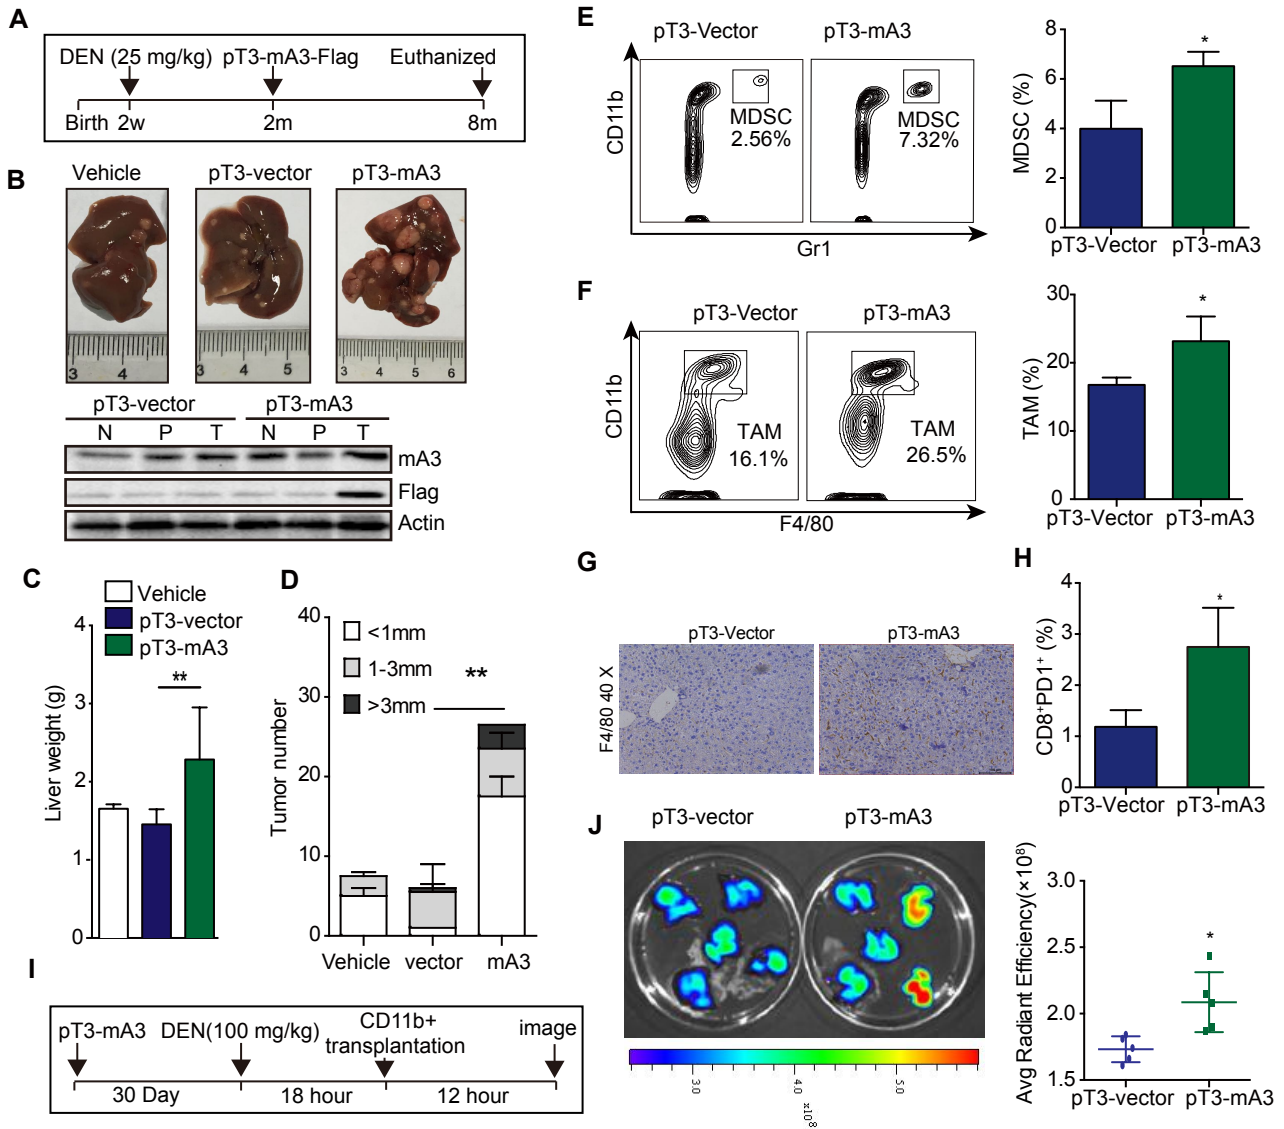

Supplement: inline-supplementary-material-5 [file inline-supplementary-material-5.pdf]

# Supplemental Figure 6

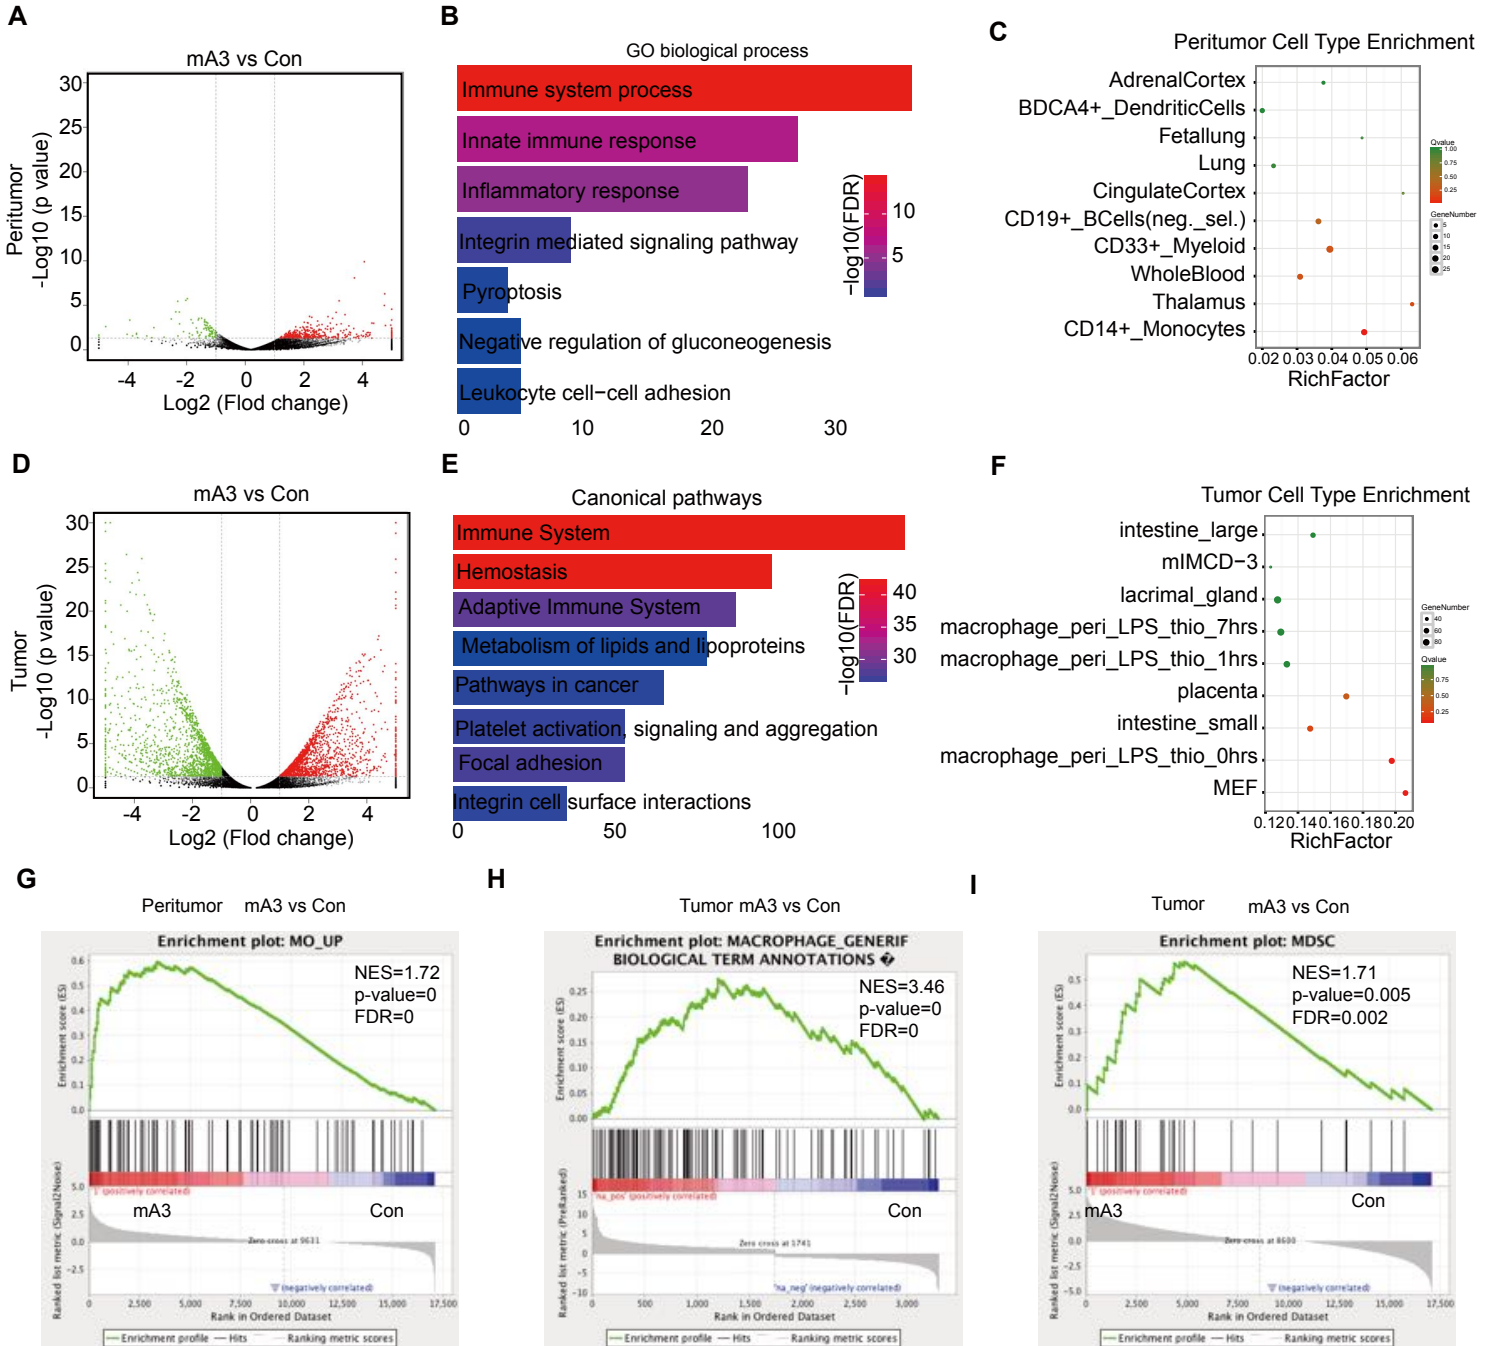

Supplement: inline-supplementary-material-6 [file inline-supplementary-material-6.pdf]

# Supplemental Figure 7

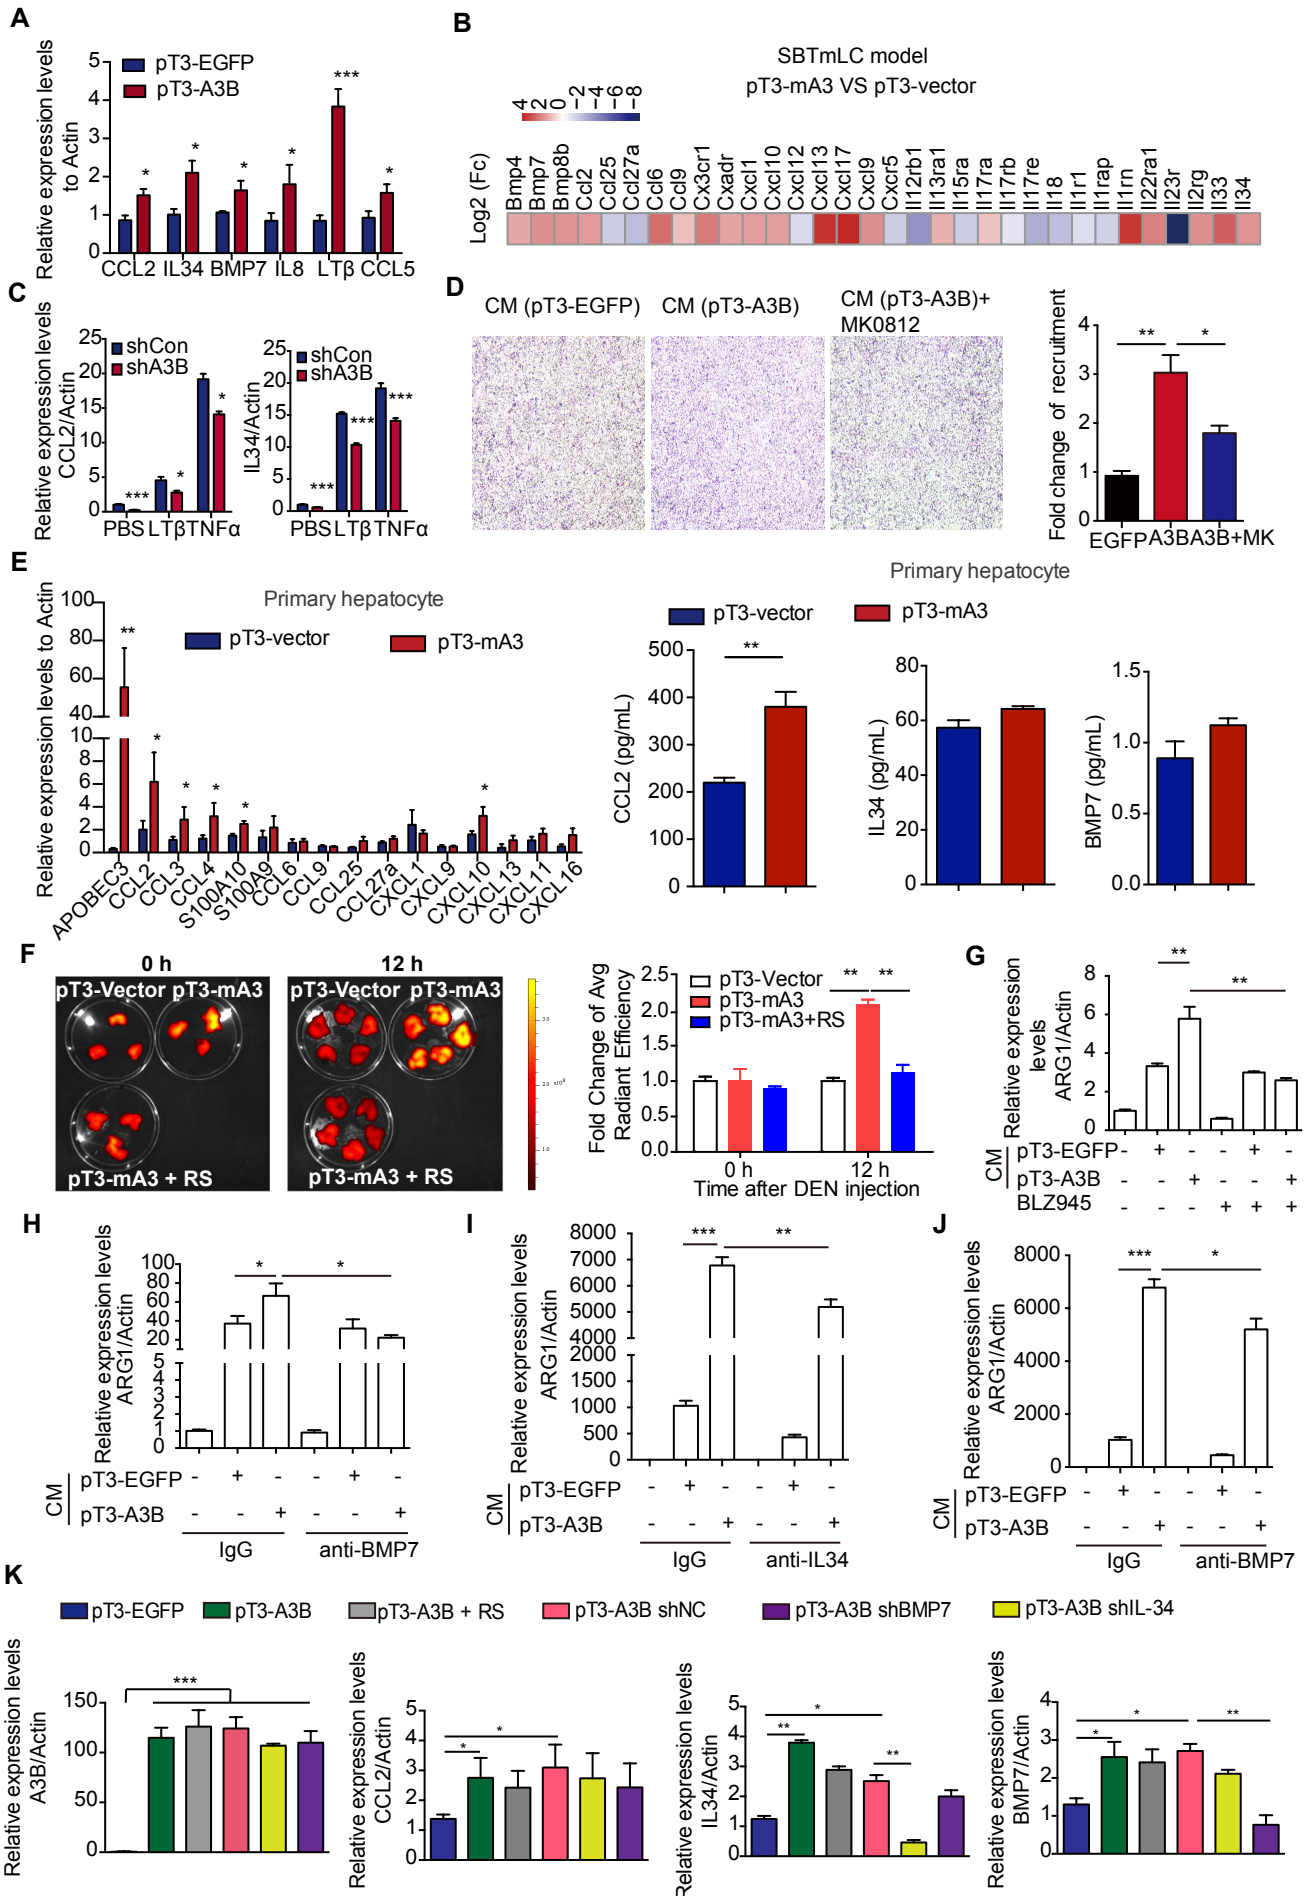

Supplement: inline-supplementary-material-7 [file inline-supplementary-material-7.pdf]

# Supplemental Figure 8

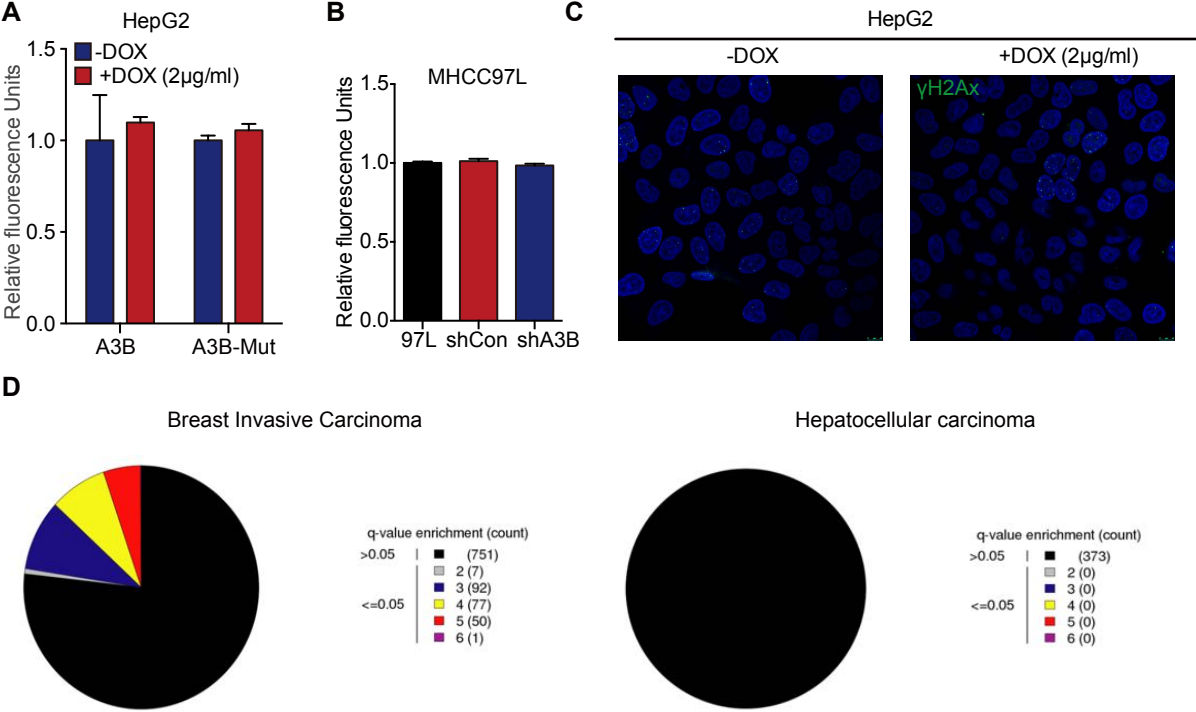

Supplement: inline-supplementary-material-8 [file inline-supplementary-material-8.pdf]
